# Supplementary material
Source: publisher figshare collection journal article supplement (https://acs.figshare.com/ndownloader/files/4930981)
Supplement: Supplementary file 1 [file 4930981]

# Raman analysis of dilute aqueous samples by localised evaporation of sub- $\mu\text{L}$ droplets on the tips of superhydrophobic copper wires

*Melody Cheung,<sup>a</sup> Wendy. W. Y. Lee,<sup>a</sup> John. N. McCracken,<sup>a</sup> Iain. A. Larmour<sup>a</sup>, Steven Brennan<sup>a</sup> and Steven E.*

*J. Bell<sup>a</sup>*

## Contents

Figure S1: Raman spectra showing dried down  $0.6\ \mu\text{L}$  drops of glucose at  $5 \times 10^{-3}\ \text{mol dm}^{-3}$  on a MPA treated tip of SHP support and (b) untreated tip of SHP support (with an extra peak at  $277\ \text{cm}^{-1}$ ). Spectra are on the same vertical axis, apart from being offset for clarity.

Figure S2: SEM image of a bare copper wire at  $300\times$ .

Figure S3: SEM image (a) of  $1 \times 10^{-3}\ \text{mol dm}^{-3}$  aqueous sucrose solution dried down on a  $230\ \mu\text{m}$  SHP support at  $700$  and  $1550\times$ . The sucrose droplets are similar to the glucose droplets, but tend to burn more easily under the electron beam. Image (b) shows a close up of the damage which eventually gives a rectangular mark on the surface.

Figure S4: Raman spectra showing (a) bulk crystalline sucrose and dried down  $0.6\ \mu\text{L}$  drops of different concentrations of sucrose: (b)  $1\ \text{mol dm}^{-3}$ , (c)  $0.1\ \text{mol dm}^{-3}$ , (d)  $1 \times 10^{-2}\ \text{mol dm}^{-3}$ , (e)  $2.5 \times 10^{-3}\ \text{mol dm}^{-3}$ , (f)  $1 \times 10^{-3}\ \text{mol dm}^{-3}$  (g)  $5 \times 10^{-4}\ \text{mol dm}^{-3}$  and (h) water. Spectra are on the same vertical axis, apart from being offset for clarity.

Figure S5: Graph showing the PLS regression plot of predicted vs. actual Glucose concentration using 1<sup>st</sup> derivatives. The data set had one outlier removed to give the best regression plot with two factors.  $R^2 = 0.9489$  and RMS error =  $7.1 \times 10^{-5} \text{ mol dm}^{-3}$  and % RMS = 12.9.

Table S1: Raman bands with corresponding peak assignments for glucose: sucrose mixtures.

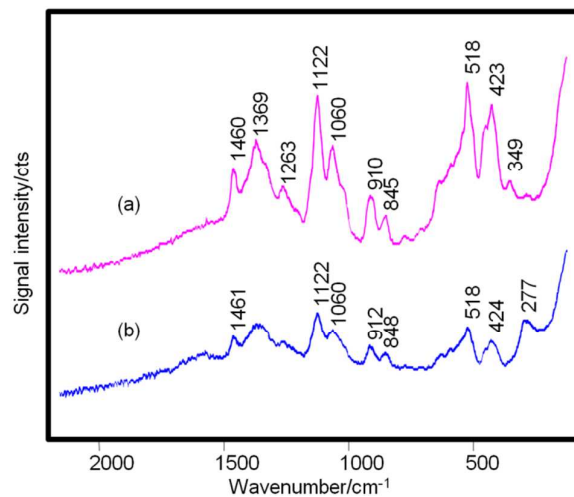

Figure S1: Raman spectra showing dried down 0.6  $\mu\text{L}$  drops of glucose at  $5 \times 10^{-3} \text{ mol dm}^{-3}$  on a MPA treated tip of SHP support and (b) untreated tip of SHP support (with an extra peak at  $277 \text{ cm}^{-1}$ ). Spectra are on the same vertical axis, apart from being offset for clarity.

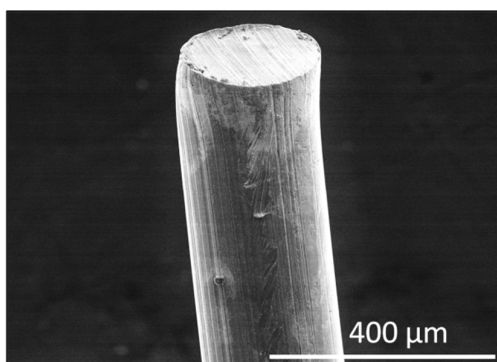

Figure S2: SEM image of a bare copper wire at  $300\times$ .

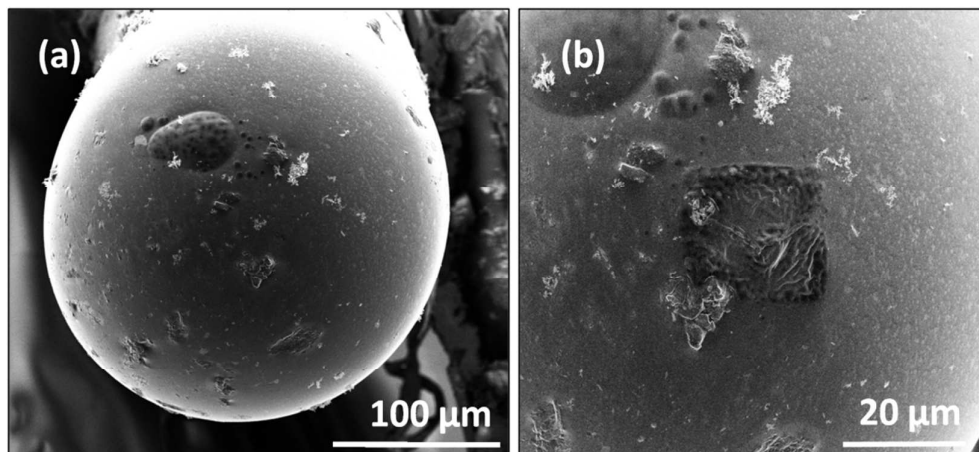

Figure S3: SEM image of (a)  $1 \times 10^{-3} \text{ mol dm}^{-3}$  aqueous sucrose solution dried down on a  $230 \text{ }\mu\text{m}$  SHP support at 700 and (b)  $1550 \times$ . The sucrose droplets are similar to the glucose droplets, but tend to burn more easily under the electron beam. Image (b) shows a close up of the damage which eventually gives a rectangular mark on the surface.

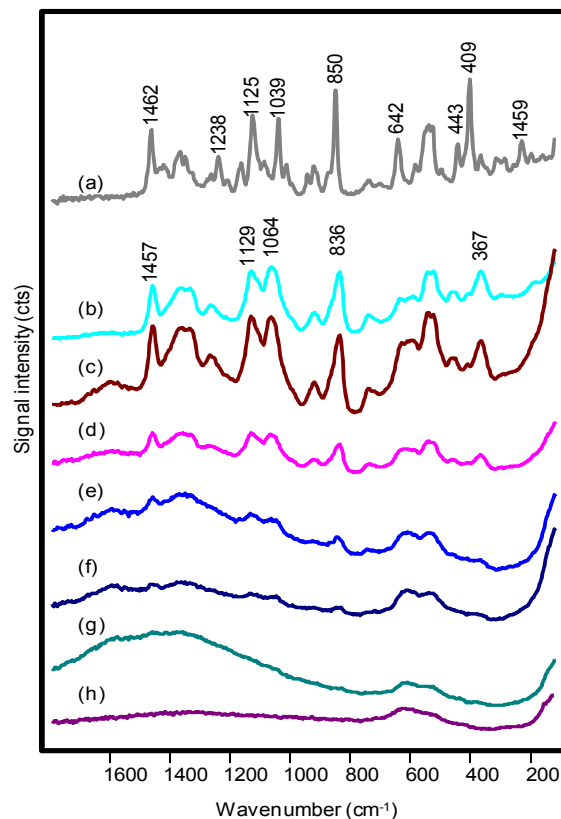

Figure S4: Raman spectra showing (a) bulk crystalline sucrose and dried down  $0.6 \text{ }\mu\text{L}$  drops of different concentrations of sucrose: (b)  $1 \text{ mol dm}^{-3}$ , (c)  $0.1 \text{ mol dm}^{-3}$ , (d)  $1 \times 10^{-2} \text{ mol dm}^{-3}$ , (e)  $2.5 \times 10^{-3} \text{ mol dm}^{-3}$ , (f)  $1 \times 10^{-3} \text{ mol dm}^{-3}$  (g)  $5 \times 10^{-4} \text{ mol dm}^{-3}$  and (h) water. Spectra are on the same vertical axis, apart from being offset for clarity.

| Bands (cm <sup>-1</sup> ) | Sugar       | Peak Assignments                                       |
|---------------------------|-------------|--------------------------------------------------------|
| 420                       | Glucose     | Deformation C-C-O and C-C-C                            |
| 520                       | Sucrose     | Deformation C-C-O and C-C-C                            |
| 835-838                   | Sucrose     | Associated with fructose, CH out of plane deformation  |
| 916-920                   | Glucose     | Deformation C-H, C-O-H                                 |
| 1060                      | Both Sugars | Stretching C-O                                         |
| 1126                      | Glucose     | Deformation C-O-H                                      |
| 1365                      | Both sugars | Asymmetric deformation in the plane of CH <sub>2</sub> |
| 1456                      | Both sugars | Symmetric deformation in the plane of CH <sub>2</sub>  |

Table S1: Raman bands with corresponding peak assignments for glucose and sucrose. **(1)**

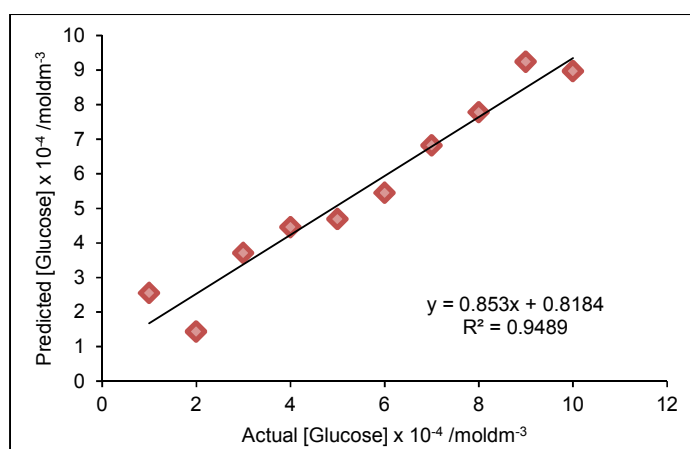

Figure S5: Graph showing the PLS regression plot of predicted vs. actual Glucose concentration using 1<sup>st</sup> derivatives. The data set had one outlier removed to give the best regression plot with two factors.  $R^2 = 0.9489$  and RMS error =  $7.1 \times 10^{-5}$  mol dm<sup>-3</sup> and % RMS = 12.9.

## References

1. Pierna, J. A. F.; Abbas, O.; Dardenne, P.; Baeten, V. *Biotechnology, Agronomy, Society and Environment*, **2011**, 15, 75-84.
